# Supplementary material for: Synthesis and structure of α-substituted pentathienoacenes
Source: Royal Society of Chemistry journal article supplement (doi:10.1039/c3tc30144c), 2013-01-01

## Powder XRD Data

### C8-T5-C8

| Peak    | 1/d <sup>2</sup> Calculated (nm <sup>-2</sup> ) | 1/d <sup>2</sup> Measured (nm <sup>-2</sup> ) | Relative Intensity |
|---------|-------------------------------------------------|-----------------------------------------------|--------------------|
| (0 0 2) | 0.430                                           | 0.432                                         | 91.05%             |
| (1 0 0) | 0.756                                           | 0.810                                         | 13.55%             |
| (0 0 3) | 0.967                                           | 0.981                                         | 12.16%             |
| (0 0 4) | 1.720                                           | 1.752                                         | 24.57%             |
| (2 0 0) | 3.025                                           | 3.008                                         | 6.01%              |
| (2 0 2) | 3.455                                           | 3.369                                         | 15.58%             |
| (2 0 3) | 3.992                                           | 4.082                                         | 17.76%             |
| (2 0 4) | 4.745                                           | 4.739                                         | 19.23%             |
| (0 1 0) | 5.408                                           | 5.289                                         | 16.91%             |
| (0 1 1) | 5.516                                           | 5.628                                         | 21.52%             |
| (1 1 2) | 6.594                                           | 6.647                                         | 100.00%            |
| (1 1 3) | 7.132                                           | 7.172                                         | 15.01%             |
| (0 1 5) | 8.096                                           | 8.215                                         | 18.97%             |
| (0 1 6) | 9.278                                           | 9.258                                         | 70.70%             |
| (3 0 5) | 9.493                                           | 9.597                                         | 18.30%             |
| (2 0 8) | 9.904                                           | 9.871                                         | 4.57%              |
| (2 1 4) | 10.153                                          | 10.431                                        | 3.25%              |
| (3 0 6) | 10.675                                          | 10.861                                        | 3.87%              |
| (1 1 7) | 11.432                                          | 11.409                                        | 13.48%             |
| (4 0 0) | 12.098                                          | 11.932                                        | 10.86%             |
| (4 0 3) | 13.066                                          | 13.247                                        | 5.82%              |
| (2 1 7) | 13.700                                          | 13.645                                        | 8.97%              |

### C12-T5-C12

| Peak    | 1/d <sup>2</sup> Calculated (nm <sup>-2</sup> ) | 1/d <sup>2</sup> Measured (nm <sup>-2</sup> ) | Relative Intensity |
|---------|-------------------------------------------------|-----------------------------------------------|--------------------|
| (0 0 3) | 0.5948                                          | 0.5944                                        | 1.0000             |
| (0 0 4) | 1.0574                                          | 1.0583                                        | 0.0505             |
| (0 0 5) | 1.6521                                          | 1.6521                                        | 0.0090             |
| (0 0 6) | 2.3790                                          | 2.3930                                        | 0.2357             |
| (2 0 2) | 3.5786                                          | 3.5432                                        | 0.0918             |
| (1 0 7) | 4.0667                                          | 4.1085                                        | 0.1131             |
| (2 0 4) | 4.3716                                          | 4.3162                                        | 0.1726             |
| (2 0 5) | 4.9664                                          | 4.8533                                        | 0.1929             |
| (0 0 9) | 5.3529                                          | 5.1706                                        | 0.1449             |
| (0 1 0) | 5.6835                                          | 5.5132                                        | 0.2126             |
| (0 1 2) | 5.9478                                          | 5.9510                                        | 0.0639             |
| (1-1 2) | 6.5568                                          | 6.6239                                        | 0.5062             |
| (1-1 3) | 6.8872                                          | 6.9305                                        | 0.3166             |
| (1 1 3) | 7.3264                                          | 7.2255                                        | 0.1219             |

|          |         |         |        |
|----------|---------|---------|--------|
| (3 0 3)  | 8.0519  | 8.0490  | 0.0322 |
| (1 1 5)  | 8.3837  | 8.3292  | 0.0294 |
| (2-1 3)  | 9.1534  | 9.2542  | 0.4281 |
| (2 1 1)  | 9.5030  | 9.5211  | 0.2334 |
| (2-1 5)  | 10.2107 | 10.1778 | 0.0399 |
| (1 1 8)  | 10.9610 | 10.8640 | 0.1146 |
| (3 0 8)  | 11.6865 | 11.5799 | 0.0384 |
| (0 1 10) | 12.2920 | 12.3332 | 0.1308 |
| (1-1 10) | 12.9009 | 13.0636 | 0.0641 |
| (3 1 2)  | 14.0637 | 13.9323 | 0.0527 |
| (3 1 7)  | 17.0375 | 17.0748 | 0.0200 |
| (4-1 4)  | 19.1196 | 19.2986 | 0.0706 |
| (5 0 1)  | 20.7803 | 20.7794 | 0.0282 |
| (5 0 4)  | 21.7715 | 21.5997 | 0.0485 |
| (0 2 2)  | 22.9983 | 22.9141 | 0.0187 |
| (0 2 4)  | 23.7913 | 23.7254 | 0.0206 |
| (5-1 4)  | 26.3571 | 26.6079 | 0.0185 |

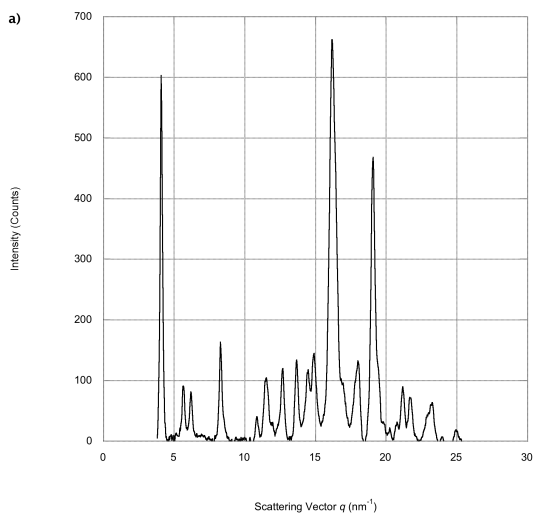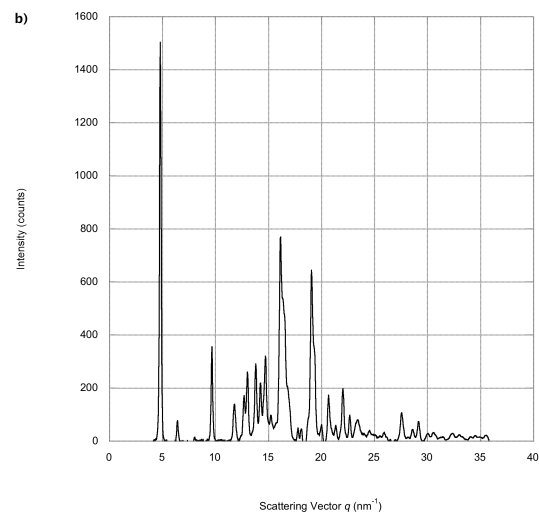

Supplement: c3tc30144c.pdf [file c3tc30144c.pdf]
